# Supplementary material for: Persistence of Mental Fatigue on Motor Control
Source: PubMed Central journal article supplement (PMC7820710; doi:10.3389/fpsyg.2020.588253), 2021-01-08
Supplement: Table_1.pdf [file Table_1.pdf]

### Supplementary data

**Supplementary Table 1.** Changes on brain oscillations during the time load dual back (TLDB) task on delta, beta, and gamma power for all regions of interest.

| Time-on-task effect on brain oscillations during the TLDB task $p(\eta_p^2)$                                                                                                               |                |                |                  |                |                |                |                  |                 |
|--------------------------------------------------------------------------------------------------------------------------------------------------------------------------------------------|----------------|----------------|------------------|----------------|----------------|----------------|------------------|-----------------|
| <b>Delta</b>                                                                                                                                                                               |                |                |                  |                |                |                |                  |                 |
| Frontal Left                                                                                                                                                                               | Frontal Median | Frontal Right  | Central Left     | Central Median | Central Right  | Posterior Left | Posterior Median | Posterior Right |
| .288<br>(.084)                                                                                                                                                                             | .235<br>(.095) | .229<br>(.097) | .147<br>(.129)   | .259<br>(.092) | .319<br>(.079) | .494<br>(.048) | .254<br>(.093)   | .178<br>(.118)  |
| Interpretation: no significant time effect on delta power.                                                                                                                                 |                |                |                  |                |                |                |                  |                 |
| <b>Beta</b>                                                                                                                                                                                |                |                |                  |                |                |                |                  |                 |
| Frontal Left                                                                                                                                                                               | Frontal Median | Frontal Right  | Central Left     | Central Median | Central Right  | Posterior Left | Posterior Median | Posterior Right |
| .002<br>(.287)                                                                                                                                                                             | .053<br>(.190) | .011<br>(.231) | < .001<br>(.459) | .025<br>(.226) | .007<br>(.244) | .074<br>(.165) | .114<br>(.143)   | .041<br>(.202)  |
| Interpretation: Decrease in beta power at the beginning of the TLDB task followed by an increase in beta power evidenced by a quadratic trend (all $ps < .030$ ; all $\eta_p^2 > .30$ ).   |                |                |                  |                |                |                |                  |                 |
| <b>Gamma</b>                                                                                                                                                                               |                |                |                  |                |                |                |                  |                 |
| Frontal Left                                                                                                                                                                               | Frontal Median | Frontal Right  | Central Left     | Central Median | Central Right  | Posterior Left | Posterior Median | Posterior Right |
| .007<br>(.244)                                                                                                                                                                             | .058<br>(.183) | .013<br>(.224) | < .001<br>(.413) | .016<br>(.245) | .005<br>(.263) | .022<br>(.203) | .132<br>(.133)   | .036<br>(.207)  |
| Interpretation: Decrease in gamma power at the beginning of the TLDB task followed by an increase in gamma power evidenced by a quadratic trend (all $ps < .045$ ; all $\eta_p^2 > .25$ ). |                |                |                  |                |                |                |                  |                 |

**Supplementary Table 2.** Changes on brain oscillations at rest on delta, beta, and gamma power for all regions of interest.

| Time effect on brain oscillations at rest $p(\eta_p^2)$                                                          |                |                |                  |                |                  |                  |                  |                 |
|------------------------------------------------------------------------------------------------------------------|----------------|----------------|------------------|----------------|------------------|------------------|------------------|-----------------|
| <b>Delta</b>                                                                                                     |                |                |                  |                |                  |                  |                  |                 |
| Frontal Left                                                                                                     | Frontal Median | Frontal Right  | Central Left     | Central Median | Central Right    | Posterior Left   | Posterior Median | Posterior Right |
| .209<br>(.101)                                                                                                   | .090<br>(.141) | .186<br>(.107) | .679<br>(.035)   | .200<br>(.104) | .253<br>(.091)   | .235<br>(.095)   | .401<br>(.067)   | .874<br>(.016)  |
| Interpretation: no significant time effect on delta power.                                                       |                |                |                  |                |                  |                  |                  |                 |
| <b>Beta</b>                                                                                                      |                |                |                  |                |                  |                  |                  |                 |
| Frontal Left                                                                                                     | Frontal Median | Frontal Right  | Central Left     | Central Median | Central Right    | Posterior Left   | Posterior Median | Posterior Right |
| .004<br>(.335)                                                                                                   | .006<br>(.312) | .002<br>(.298) | .004<br>(.337)   | .029<br>(.237) | .001<br>(.321)   | .001<br>(.319)   | .034<br>(.224)   | .009<br>(.238)  |
| Interpretation: significant linear increase in beta power over time (all $ps < .033$ ; all $\eta_p^2 > .286$ ).  |                |                |                  |                |                  |                  |                  |                 |
| <b>Gamma</b>                                                                                                     |                |                |                  |                |                  |                  |                  |                 |
| Frontal Left                                                                                                     | Frontal Median | Frontal Right  | Central Left     | Central Median | Central Right    | Posterior Left   | Posterior Median | Posterior Right |
| < .001<br>(.355)                                                                                                 | .001<br>(.322) | .001<br>(.318) | < .001<br>(.355) | .002<br>(.303) | < .001<br>(.382) | < .001<br>(.381) | .001<br>(.304)   | .001<br>(.252)  |
| Interpretation: significant linear increase in gamma power over time (all $ps < .015$ ; all $\eta_p^2 > .356$ ). |                |                |                  |                |                  |                  |                  |                 |
